# Supplementary material for: Efficient perovskite light-emitting diodes by film annealing temperature control
Source: Royal Society of Chemistry journal article supplement (doi:10.1039/c6ra14393h), 2016-01-01
Supplement: c6ra14393h1.pdf [file c6ra14393h1.pdf]

## Supporting Information

### Efficient Perovskite Light-Emitting Diodes by Film Annealing Temperature Control

Junqing Liang,<sup>ab</sup> Yongqiang Zhang,<sup>ab</sup> Xiaoyang Guo,<sup>\*a</sup> Zhihong Gan<sup>a</sup>, Jie Lin<sup>a</sup>, Yi Fan<sup>a</sup>, and  
Xingyuan Liu<sup>\*a</sup>

<sup>a</sup>State Key Laboratory of Luminescence and Applications, Changchun Institute of Optics,  
Fine Mechanics and Physics, Chinese Academy of Sciences, Changchun 130033, China

<sup>b</sup>University of Chinese Academy of Sciences, Beijing 100049, China

\*E-mail: [guoxy@ciomp.ac.cn](mailto:guoxy@ciomp.ac.cn) ; [liuxy@ciomp.ac.cn](mailto:liuxy@ciomp.ac.cn)

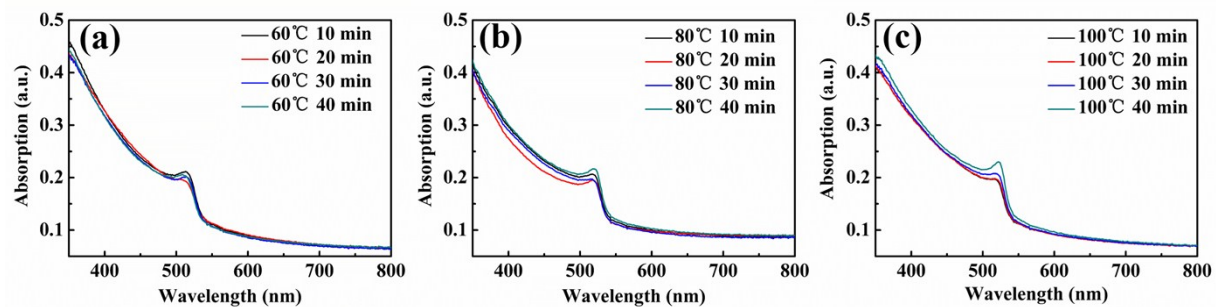

**Fig. S1.** Absorption spectra of MAPbBr<sub>3</sub> films annealed under (a) 60°C, (b) 80°C and (c) 100°C.

**Table S1.** Photophysical properties of MAPbBr<sub>3</sub> films annealed under 60°C, 80°C and 100°C.

| Annealing temperature and time | FWHM (nm) | Absorption peak (nm) | Maximum emission wavelength (nm) | PLQY (%) |
|--------------------------------|-----------|----------------------|----------------------------------|----------|
| 60°C 10min                     | 23        | 514                  | 535                              | 4        |
| 60°C 20min                     | 23        | 514                  | 534                              | 6        |
| 60°C 30min                     | 24        | 515                  | 534                              | 8        |
| 60°C 40min                     | 24        | 513                  | 534                              | 7        |
| 80°C 10min                     | 22        | 519                  | 536                              | 12       |
| 80°C 20min                     | 22        | 519                  | 536                              | 12       |
| 80°C 30min                     | 22        | 518                  | 536                              | 10       |
| 80°C 40min                     | 21        | 520                  | 537                              | 5        |
| 100°C 10min                    | 22        | 518                  | 535                              | 6        |
| 100°C 20min                    | 27        | 518                  | 534                              | 2        |
| 100°C 30min                    | 27        | 518                  | 535                              | 1        |
| 100°C 40min                    | 27        | 521                  | 536                              | 0.6      |

PLQY measurements were carried out after the film were encapsulated in a N<sub>2</sub> filled glove box. For this reason, the measured PLQY values may be lower than the actual values due to the decreased light intensity through encapsulating glass.
